# Supplementary material for: Particulate Matter Concentrations over South Korea: Impact of Meteorology and Other Pollutants
Source: MDPI journal article supplement (doi:10.3390/rs14194849), 2022-09-28
Supplement: s1 [file s1]

Archive with 1 entries (1 files):
- remotesensing-1896945-supplementary.pdf
